# Supplementary material
Source: Springer Nature journal article supplement (https://www.springermedizin.de/resource/supplementary/12885_2013_4039_MOESM4_ESM.pdf/9465086)

Persistence rate (%)  $\rightarrow$  single GAP > 60 days

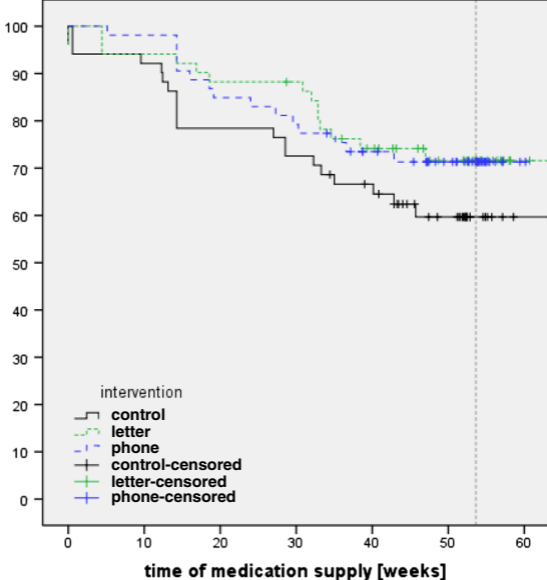

Supplement: MOESM4 [file 9465086]
